# Supplementary material for: Overexpression of microRNA-634 suppresses survival and matrix synthesis of human osteoarthritis chondrocytes by targeting PIK3R1
Source: PubMed Central journal article supplement (PMC4789801; doi:10.1038/srep23117), 2016-03-14
Supplement: srep23117-s1.pdf [file srep23117-s1.pdf]

## Supplementary data

### Overexpression of microRNA-634 suppresses survival and matrix synthesis of human osteoarthritis chondrocytes by targeting PIK3R1

Cui Xu<sup>1,#</sup> Shaojie Wang<sup>1,#</sup> Heguo Cai<sup>1</sup> Yuan Lin<sup>1</sup> Xinpeng Zheng<sup>1</sup> Bing Zhang<sup>2,\*</sup> Chun Xia<sup>1,\*</sup>

<sup>1</sup>Zhongshan Hospital, Xiamen University, Xiamen, Fujian, 361000, China

<sup>2</sup>Medical School, Xiamen University, Xiamen, Fujian, 361102, China

# These authors contributed equally to this work and should be considered as co-first authors.

E-mails: Cui Xu (cuixu666@qq.com); Shaojie Wang (459871798@qq.com); Heguo Cai (442600841@qq.com); Yuan Lin(13860496252@163.com); Xinpeng Zheng(113794258@qq.com).

\*Correspondence and requests for materials should be addressed to Bing Zhang (cristal66@xmu.edu.cn) or Chun Xia ([chunxia@xmu.edu.cn](mailto:chunxia@xmu.edu.cn)).

#### Supplementary Figure 1

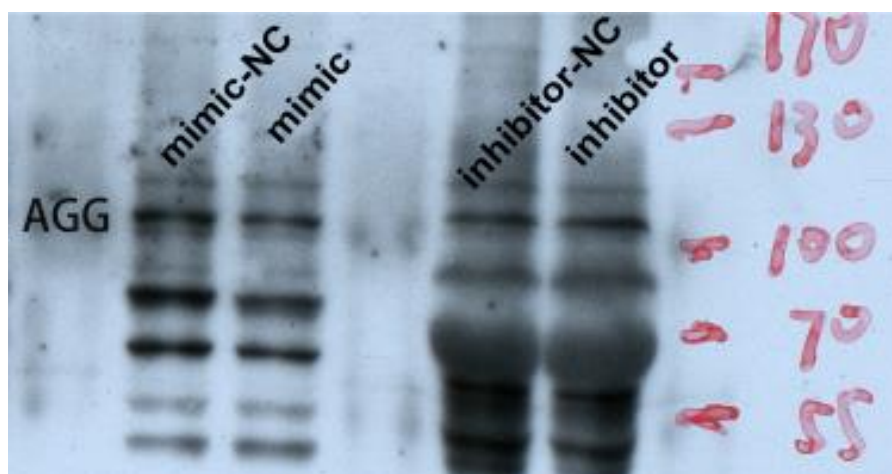

Supplementary Figure 1 The full-length gel indicates the effect of miR-634 on Aggrecan(AGG) expression of human OA chondrocytes.

Supplementary Figure 2

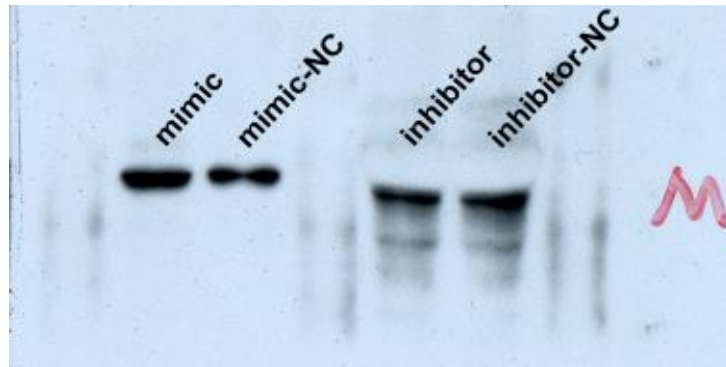

Supplementary Figure 2 The full-length gel indicates the effect of miR-634 on MMP13(M) expression of human OA chondrocytes.

Supplementary Figure 3

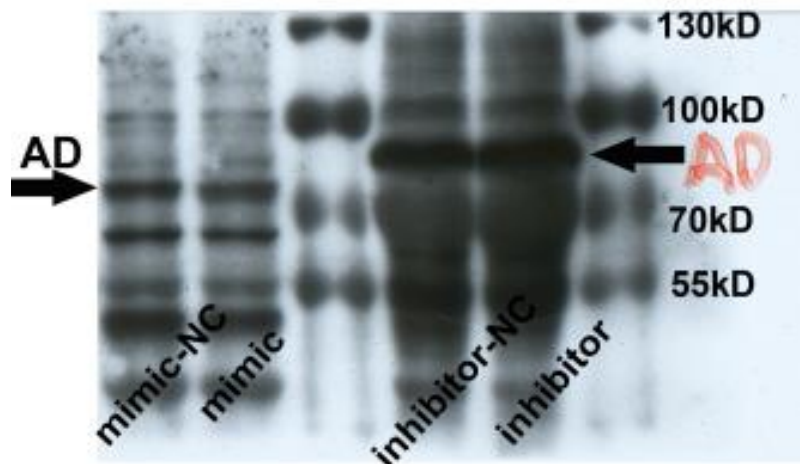

Supplementary Figure 3 The full-length gel indicates the effect of miR-634 on ADAMTS-5(AD) expression of human OA chondrocytes.
